# Supplementary material for: Detecting Geothermal Resources in a Plateau Area: Constraints From Land Surface Temperature Characteristics Using Landsat 8 Data
Source: Frontiers journal article supplement (doi:10.3389/feart.2022.785900), 2022-04-08
Supplement: Table_1.XLS [file Table_1.XLS]

## Sheet: Sheet1
TIME：2017/3/28			Latitude and longitude				Latitude and longitude 纬度
Range of Pixels：25×25			29°57'50.55"N,101°57'29.89"E				30°16'14.65"N,101°52'27.20"E
NO.	Lao Yulin （unit:℃）					Zhonggu Village （unit:℃）
1	22.917				1	21.625
2	23.218				2	21.484
3	22.659				3	21.095
4	21.225				4	20.416
5	22.29				5	19.556
6	21.799				6	18.284
7	22.357				7	19.286
8	23.096				8	20.177
9	23.384				9	20.793
10	22.55				10	21.078
11	22.357				11	20.477
12	23.037				12	19.92
13	23.384				13	19.081
14	23.263				14	17.981
15	22.211				15	16.844
16	22.776				16	17.306
17	22.607				17	16.453
18	23.263				18	17.613
19	23.096				19	18.628
20	22.789				20	19.73
21	23.218				21	18.749
22	22.557				22	17.495
23	22.37				23	16.075
24	22.384				24	16.378
25	23.219				25	16.737
Average	22.721					18.9304
Real	23.615					19.798
Error	0.89396					0.86756
Standard Error	0.400142					0.612208
Range of Pixels：10×10
1	23.218				1	20.799
2	22.659				2	19.954
3	23.384				3	18.925
4	22.55				4	19.885
Average	22.9528					19.8908
Real	23.615					19.798
Error	0.66225					-0.09275
Standard Error	0.410216					0.766295
Range of Pixels：15×15
1	23.095				1	20.799
2	23.384				2	19.954
3	22.55				3	18.925
4	22.211				4	19.885
5	23.263				5	18.886
6	23.037				6	17.802
7	22.607				7	21.374
8	22.776				8	20.625
9	21.558				9	19.831
Average	22.72					19.7868
Real	23.615					19.798
Error	0.895					0.01123
Standard Error	0.573475					1.10564
Range of Pixels：20×20
1	22.917				1	21.625
2	23.218				2	21.484
3	22.659				3	21.095
4	21.225				4	20.416
5	22.29				5	19.556
6	21.799				6	18.284
7	22.357				7	19.286
8	23.096				8	20.177
9	23.384				9	20.793
10	22.55				10	21.078
11	22.357				11	20.477
12	23.037				12	19.92
13	23.384				13	19.081
14	23.263				14	17.981
15	22.211				15	16.844
16	22.776				16	17.306
Average	22.6576					19.7126
Real	23.615					19.798
Error	0.9574					0.0854
Standard Error	0.534114					0.971538
Range of Pixels：5×5
1	22.917				1	20.799
Real	23.615					19.798
Error	0.698					-1.001
Conclusion：	After the above data comparison, error analysis, choose 10×10 range as the sampling point, the accuracy can reach 0-0.6K。
