# Supplementary material for: Detecting Geothermal Resources in a Plateau Area: Constraints From Land Surface Temperature Characteristics Using Landsat 8 Data
Source: Frontiers journal article supplement (doi:10.3389/feart.2022.785900), 2022-04-08
Supplement: Table_2.XLSX [file Table_2.XLSX]

## Sheet: Atmospheric transmittance
RTE		Results(unit：℃)	△
0.94		16.981
0.95		16.314	0.041711
0.96		15.658
0.97		15.011
Real		15.991
MW
0.94		16.1191
0.95		16.0276	0.00516799
0.96		15.9381
0.97		15.8507
Real		15.983
SW
0.94		16.2248
0.95		14.9282	0.0908047
0.96		14.8374
0.97		14.7466
Real		14.279

## Sheet: Surface Specific Emissivity
RTE		Results(unit：℃)	△
0		16.3941
0.01		16.3347	0.00367985
0.02		16.2754
0.03		16.2161
Real		16.305
MW
0		16.2397
0.01		16.1467	0.00496124
0.02		16.0829
0.03		16.0346
Real		16.125
SW
0		14.8315
0.01		14.0445	0.0585652
0.02		13.2778
0.03		12.4864
Real		13.66

## Sheet: Near-surface temperature
RTE		Results(unit：℃)	△
7		16.3664
8		16.2822	0.0164996
9		16.1158
10		16.6955
Real		16.364
MW
7		16.2802
8		16.2147
9		16.1491	0.00432606
10		16.0836
Real		16.181
SW
7		14.9282
8		15.4164
9		15.8026	0.0269356
10		16.2248
Real		15.593
